# Supplementary material for: Lifestyle factors and risk of multimorbidity of cancer and cardiometabolic diseases: a multinational cohort study
Source: Springer Nature journal article supplement (doi:10.1186/s12916-019-1474-7), 2020-01-10

**Lifestyle Factors and Risk of Multimorbidity of Cancer and Cardiometabolic Diseases: A Multinational Cohort Study**

Heinz Freisling, PhD\*; Vivian Viallon, PhD; Hannah Lennon, PhD *et al.*

\*Corresponding Author:

Heinz Freisling, PhD

International Agency for Research on Cancer, World Health Organization

150 cours Albert Thomas

69372 Lyon CEDEX 08, France

Off. +33 472 738 664

Mob. + 33 698 557 239

E-mail: [freislingh@iarc.fr](mailto:freislingh@iarc.fr)

**Table S1:** Scoring of the healthy lifestyle index (HLI) and its simplified version

**Figure S1:** Participant flow-chart

**Figure S2:** Transitions from baseline to cancer, cardiovascular disease (CVD), type-2 diabetes (T2D) and specific multimorbidity patterns within the EPIC study

**Figure S3:** Subgroup analysis of associations between lifestyle factors and cancer-cardiometabolic multimorbidity

**Figure S4:** Absolute risk estimates for 55 years old men and women for values of the healthy lifestyle index

**Figure S5:** Sensitivity analysis of associations between healthy lifestyle index and cancer-cardiometabolic multimorbidity

**Figure S6:** Sensitivity analysis of associations between a simplified healthy lifestyle index and cancer-cardiometabolic multimorbidity

**Figure S7:** Absolute risk estimates for 65 years old men and women for values of a simplified healthy lifestyle index comparing individuals adhering to 4 healthy lifestyle habits vs. individuals adhering to 1 healthy lifestyle habit.

**Figure S8.** Absolute risk estimates for 65 years old men and women for values of the healthy lifestyle index to develop cancer-cardiometabolic multimorbidity after a less and more survivable cancer.

**Table S1.** Scoring of the healthy lifestyle index (HLI) and its simplified version

| <b>Modifiable lifestyle factor</b>          | <b>Scoring HLI</b>  |         | <b>Scoring sHLI</b> |     |
|---------------------------------------------|---------------------|---------|---------------------|-----|
| <i>Body mass index</i>                      |                     |         |                     |     |
| kg/m <sup>2</sup>                           | ≥22 to <24          | 4       | ≥18.5 to <25        | 1   |
|                                             | <22                 | 3       | ≥25 to <30          | 0.5 |
|                                             | ≥24 to <26          | 2       | <18.5               | 0   |
|                                             | ≥26 to <30          | 1       | ≥30                 | 0   |
|                                             | ≥30                 | 0       |                     |     |
| <i>Smoking status</i>                       |                     |         |                     |     |
| Categories                                  | Never               | 4       | Never               | 1   |
|                                             | Former              | 2       | Former              | 0.5 |
|                                             | Current             | 0       | Current             | 0   |
| <i>Physical activity index<sup>1</sup></i>  |                     |         |                     |     |
| Categories                                  | Active              | 4       | Active              | 1   |
|                                             | Moderately active   | 3       | Moderately active   | 1   |
|                                             | Moderately inactive | 1       | Moderately inactive | 0   |
|                                             | Inactive            | 0       | Inactive            | 0   |
| <i>Alcohol intake</i>                       |                     |         |                     |     |
| g/d                                         | <6                  | 4       | <6 (W) or <12 (M)   | 1   |
|                                             | ≥6 to <12           | 3       | ≥6 (W) or ≥12 (M)   | 0   |
|                                             | ≥12 to <25          | 2       |                     |     |
|                                             | ≥ to <60            | 1       |                     |     |
|                                             | >60                 | 0       |                     |     |
| <i>Mediterranean diet score<sup>2</sup></i> |                     |         |                     |     |
| Quintiles                                   | Q5                  | 4       | ≥ median            | 1   |
|                                             | Q4                  | 3       | < median            | 0   |
|                                             | Q3                  | 2       |                     |     |
|                                             | Q2                  | 1       |                     |     |
|                                             | Q1                  | 0       |                     |     |
| <i>Range</i>                                |                     | 0 to 20 | 0 to 5              |     |

HLI, healthy lifestyle index

sHLI, simplified healthy lifestyle index

W, women; M, men

<sup>1</sup> Wareham NJ, Jakes RW, Rennie KL, Schuit J, Mitchell J, Hennings S, Day NE. Validity and repeatability of a simple index derived from the short physical activity questionnaire used in the European Prospective Investigation into Cancer and Nutrition (EPIC) study. *Public Health Nutr.* 2003 Jun;6(4):407-13.

<sup>2</sup> Buckland G, González CA, Agudo A, Vilardell M, Berenguer A, Amiano P, et al. Adherence to the mediterranean diet and risk of coronary heart disease in the spanish EPIC cohort study. *Am J Epidemiol.* 2009;170(12):1518–29.

**Figure S1.** Flowchart of exclusion steps in the EPIC (European Prospective Investigation into Cancer and Nutrition) multimorbidity data.

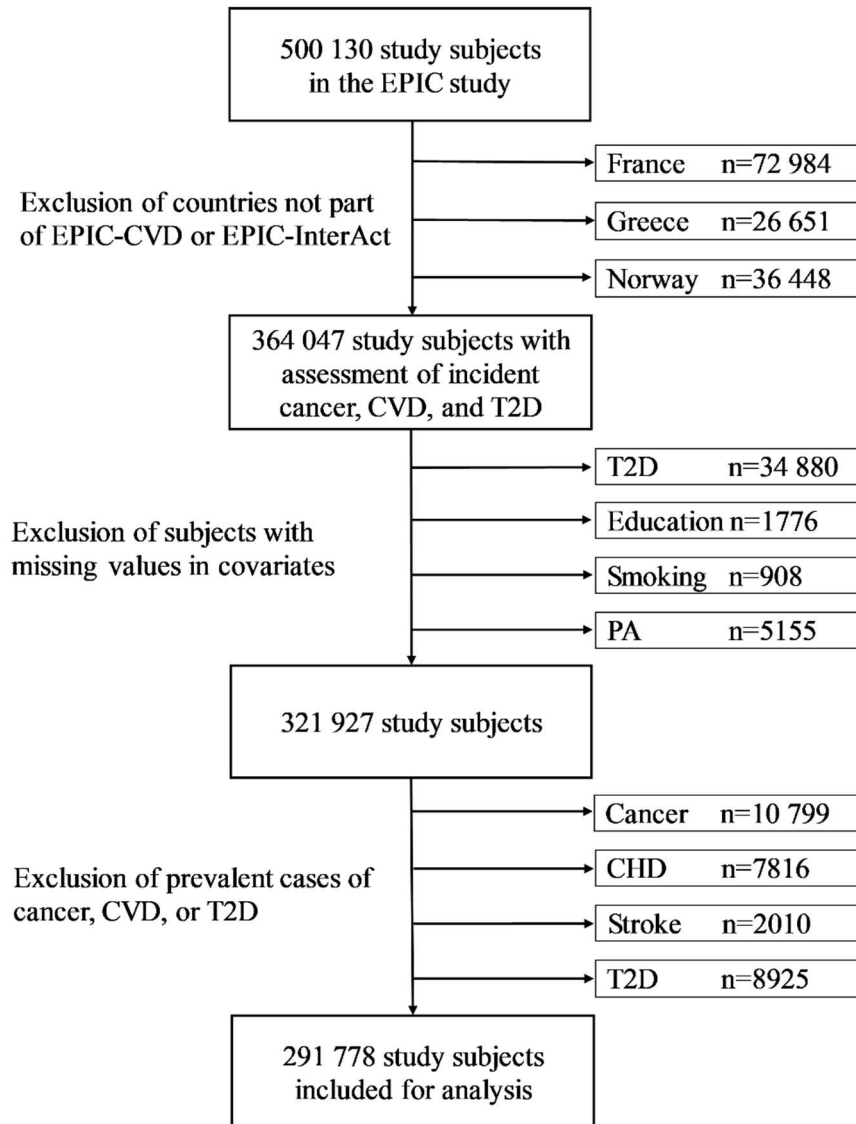

**Figure S2.** Transitions from baseline to cancer, cardiovascular disease (CVD), type-2 diabetes (T2D) and specific multimorbidity patterns within the EPIC study

State-specific number of events are in boxes, and transition-specific number of events and incidence rates per 1000 person-years are reported on arrows.

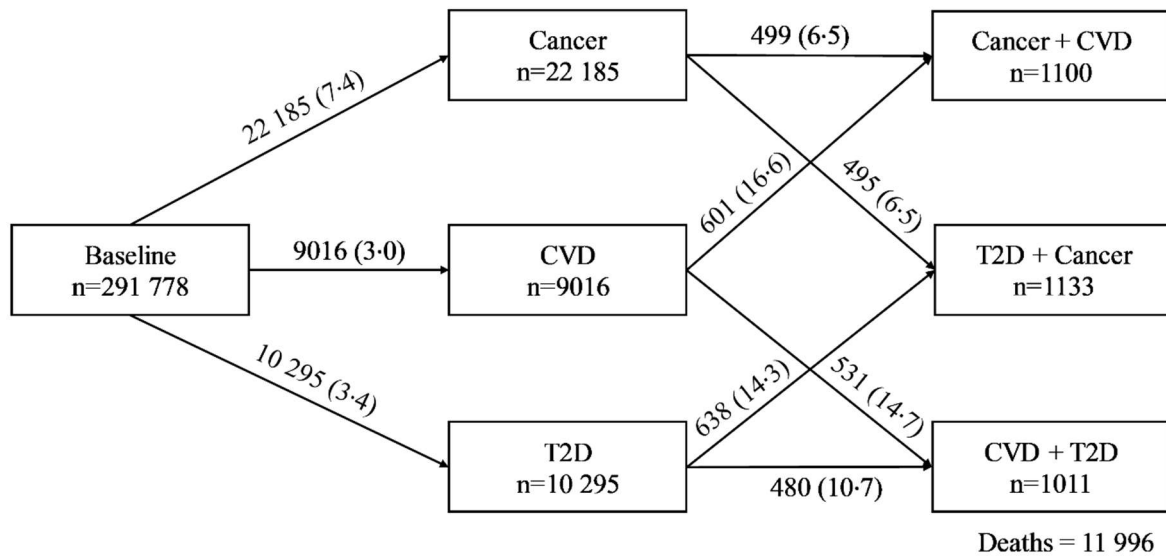

**Figure S3.** Subgroup analysis of associations of a 3-unit increment (~1 standard deviation) in the healthy lifestyle index (HLI) with first cancer at any site, cardiovascular disease (CVD), type-2 diabetes (T2D), and transitions to cancer-cardiometabolic multimorbidity.

Cox proportional hazard models, stratified by age at inclusion (1-year categories), sex, centre and transition, in a clock-forward multi-state analysis with age as primary time variable, adjusted for education level (no schooling, primary, secondary and university or more), height (continuous), an indicator of alcohol use (no/yes), total energy intake (kcal/day), and use of hormones and menopausal status in women.

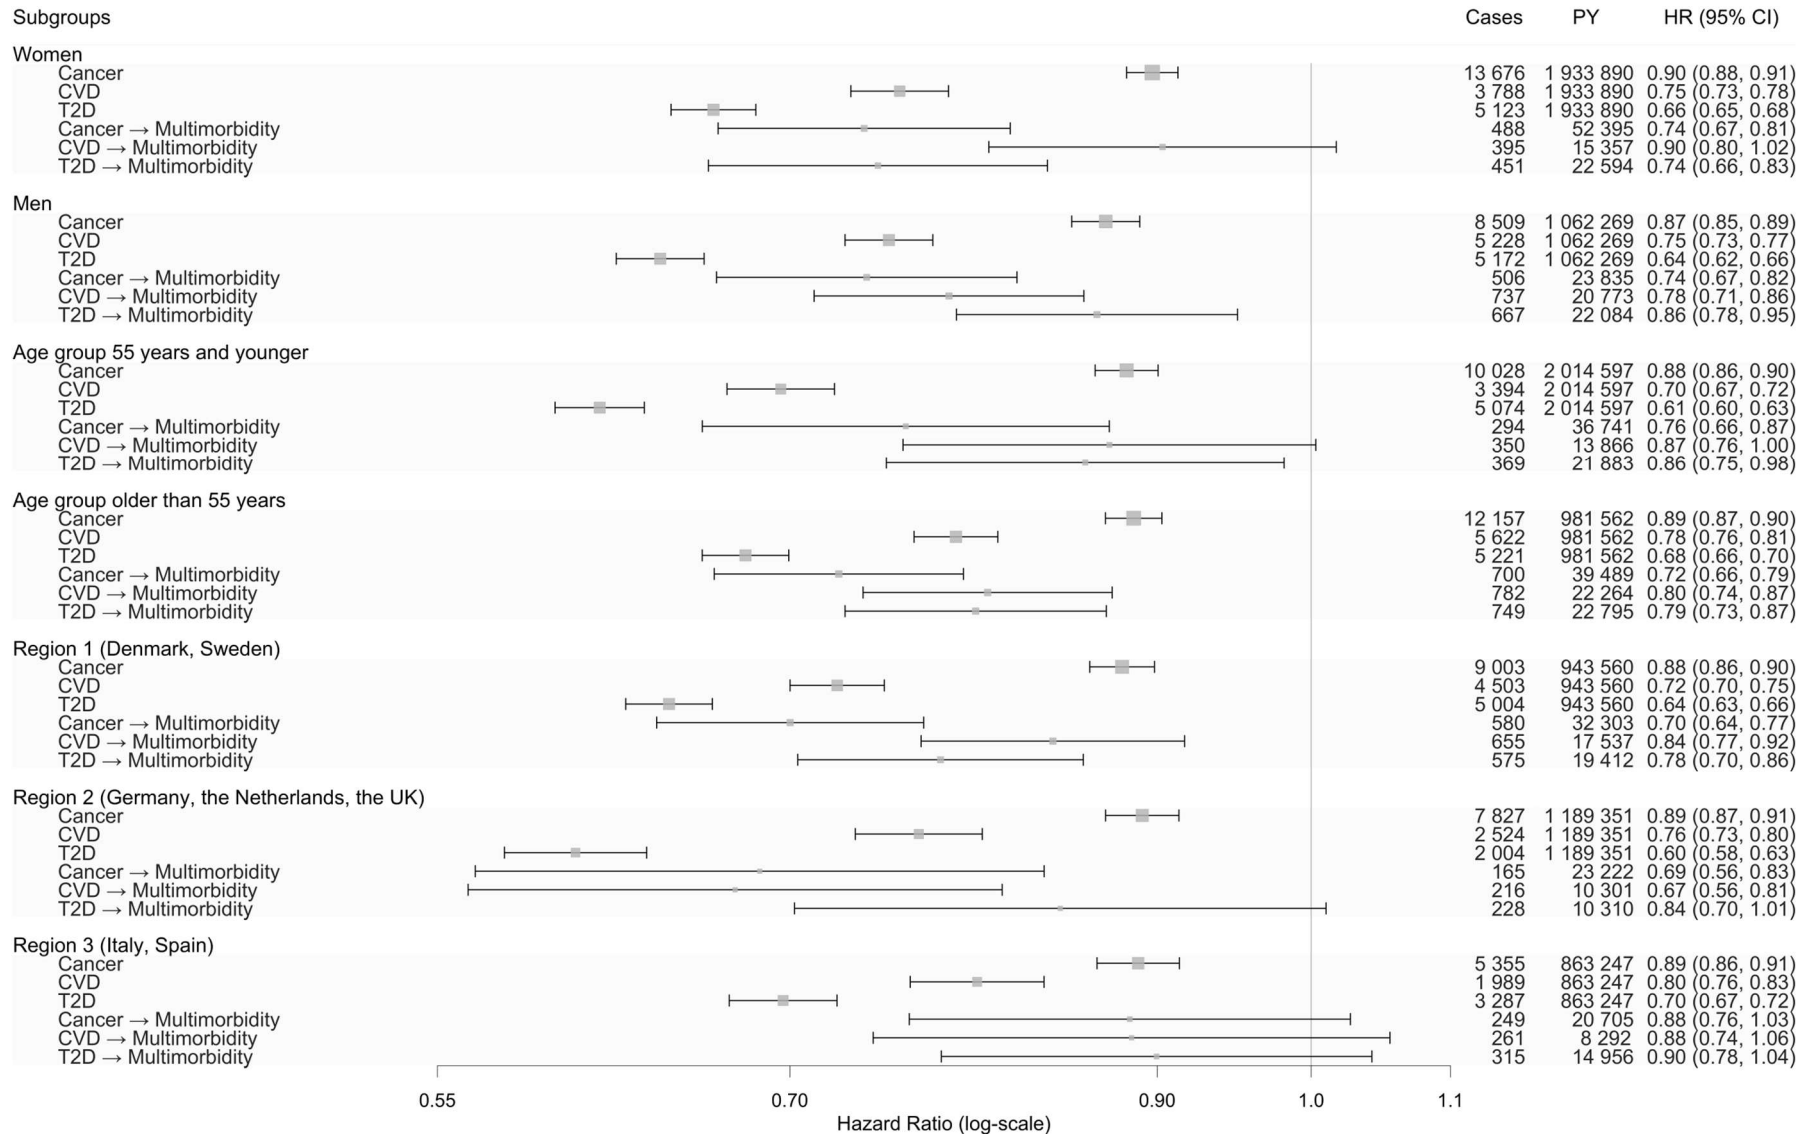

**Figure S4.** Cumulative incidence functions to develop first cancer at any site, cardiovascular disease (CVD), type-2 diabetes (T2D), and subsequent cancer-cardiometabolic multimorbidity (MM) for 55 years old men (dotted) and women (continuous) for values of the healthy lifestyle index (HLI) of 15 (healthy, 85<sup>th</sup> percentile in green) and 5 (unhealthy, 4<sup>th</sup> percentile in red); the HLI ranges from 0 to 20 units, with greater scores reflecting healthy lifestyles.

Cancer refers to first malignant tumors at any site excl. non-melanoma skin cancer. Deaths were censored and not modelled as a separate outcome.

The model was stratified for centre, sex, and adjusted for education level (no schooling, primary, secondary and university or more), height (continuous), binary indicator of alcohol use (no/yes), total energy intake (kcal/day), and use of hormones and menopausal status in women.

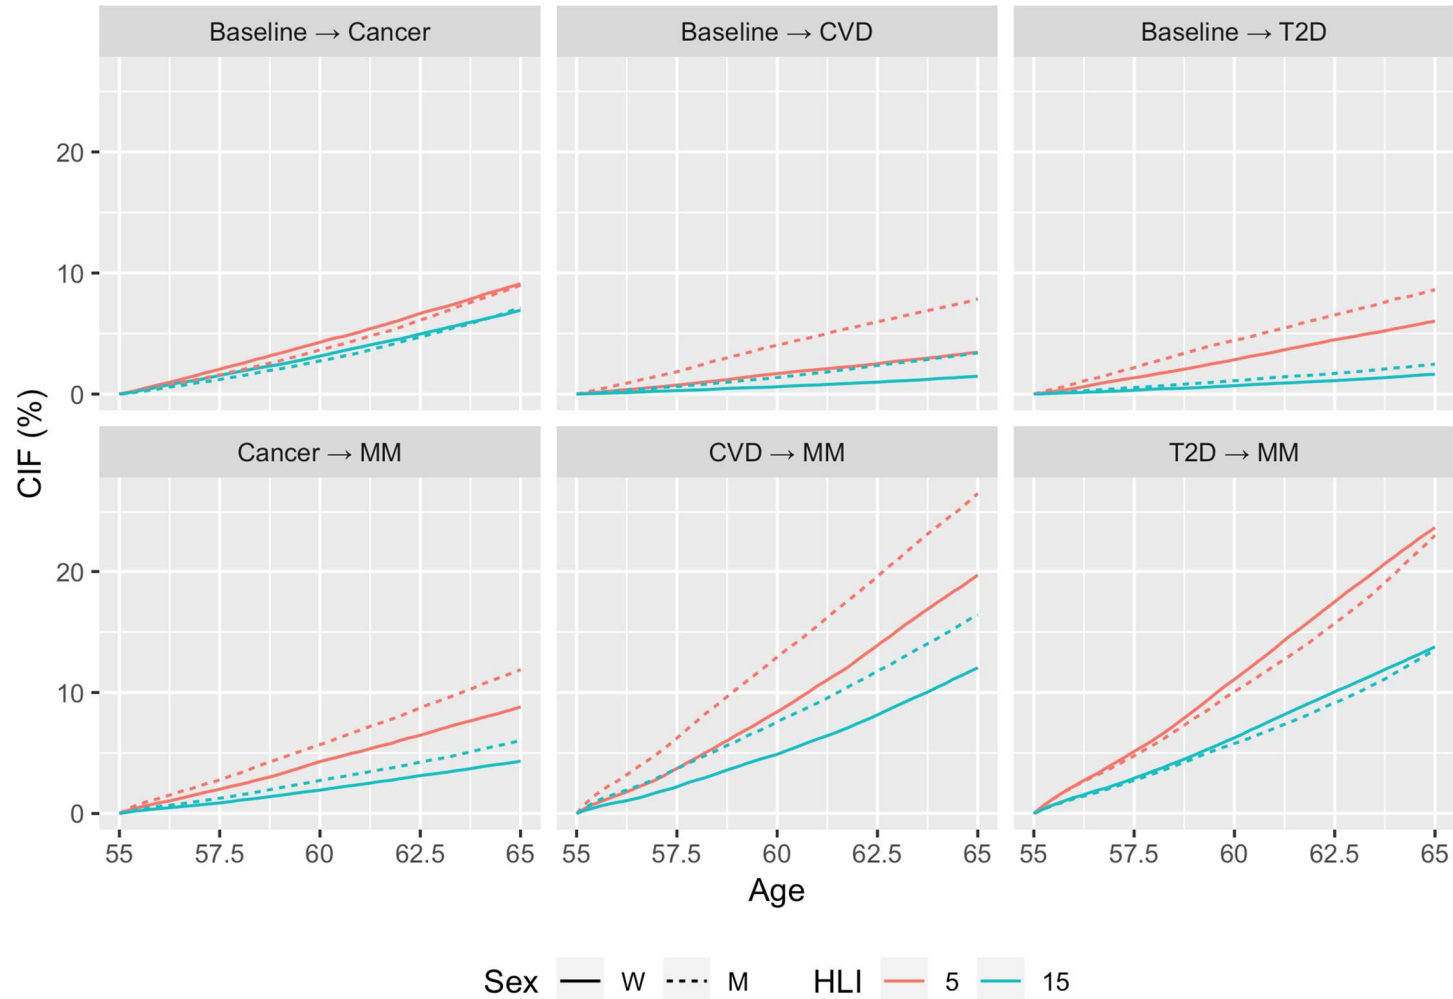

**Figure S5.** Sensitivity analysis excluding in turn one of the components of the healthy lifestyle index (HLI) of associations of a 3-unit increment (~1 standard deviation) in the HLI with first cancer at any site, cardiovascular disease (CVD), type-2 diabetes (T2D), and transitions to cancer-cardiometabolic multimorbidity.

Cox proportional hazard models, stratified by age at inclusion (1-year categories), sex, centre and transition, in a clock-forward multi-state analysis with age as primary time variable, adjusted for education level (no schooling, primary, secondary and university or more), height (continuous), an indicator of alcohol use (no/yes), total energy intake (kcal/day), and use of hormones and menopausal status in women.

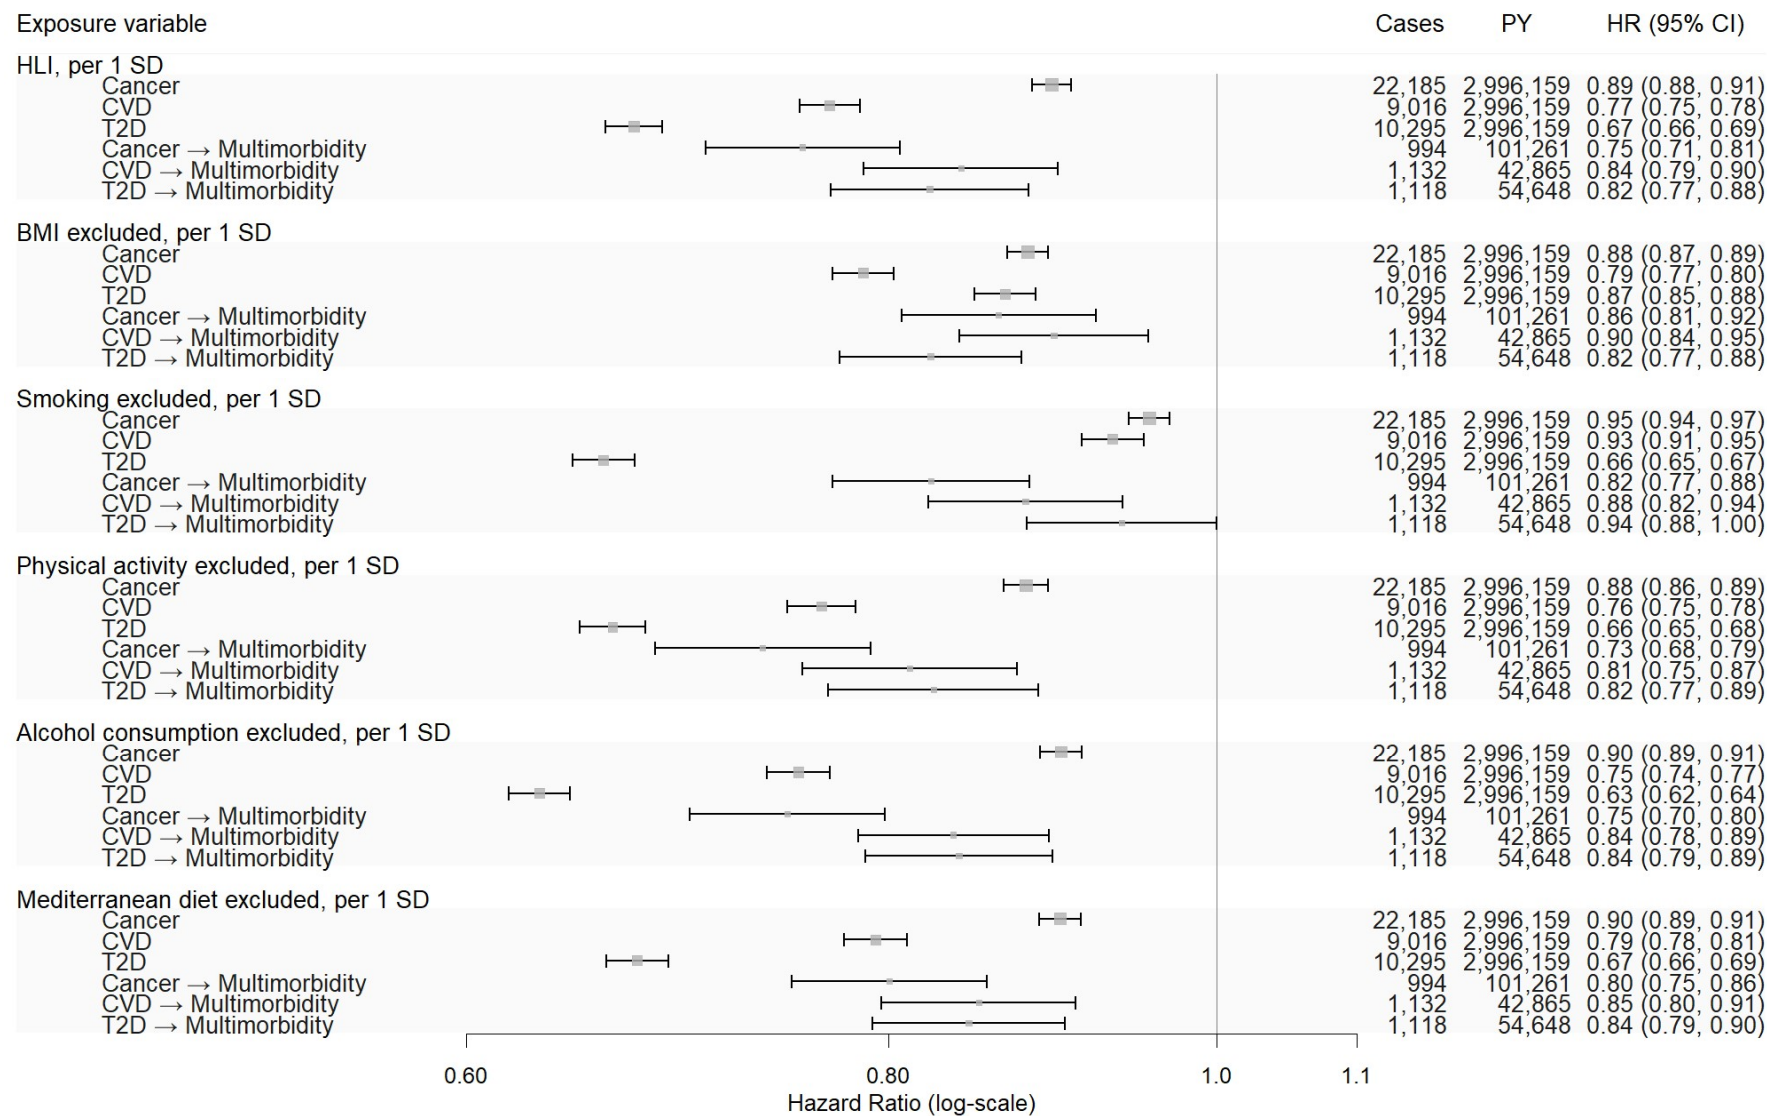

**Figure S6.** Sensitivity analysis comparing associations of 1 standard deviation (SD) increments in [A] the healthy lifestyle index (HLI), and [B] a simplified HLI, with first cancer at any site, cardiovascular disease (CVD), type-2 diabetes (T2D), and transitions to cancer-cardiometabolic multimorbidity.

Cox proportional hazard models, stratified by age at inclusion (1-year categories), sex, centre and transition, in a clock-forward multi-state analysis with age as primary time variable, adjusted for education level (no schooling, primary, secondary and university or more), height (continuous), an indicator of alcohol use (no/yes), total energy intake (kcal/day), and use of hormones and menopausal status in women.

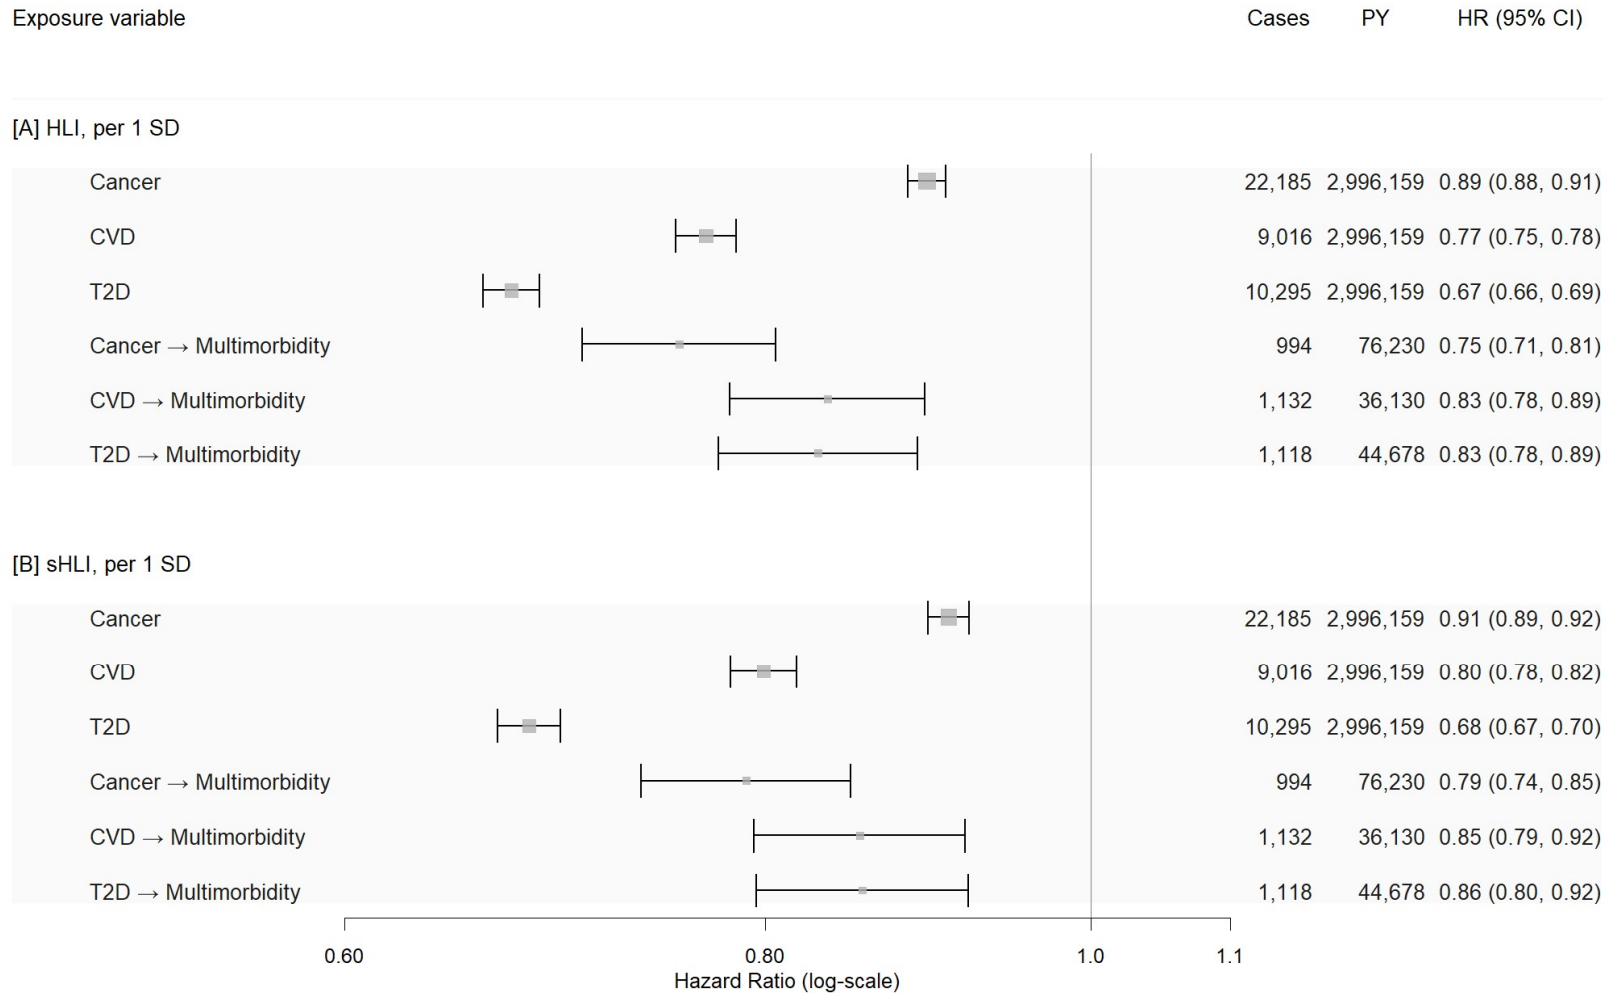



**Figure S7.** Cumulative incidence functions to develop first cancer at any site, cardiovascular disease (CVD), type-2 diabetes (T2D), and subsequent cancer-cardiometabolic multimorbidity (MM) for 65 years old men (dotted) and women (continuous) for values of the **simplified healthy lifestyle index (sHLI)** of 4 (four healthy lifestyle habits, 90<sup>th</sup> percentile in green) and 1 (unhealthy [one healthy lifestyle habit], 5<sup>th</sup> percentile in red); the sHLI ranges from 0 to 5 units.

Cancer refers to first malignant tumors at any site excl. non-melanoma skin cancer. Deaths were censored and not modelled as a separate outcome.

The model was stratified for centre, sex, and adjusted for education level (no schooling, primary, secondary and university or more), height (continuous), binary indicator of alcohol use (no/yes), total energy intake (kcal/day), and use of hormones and menopausal status in women

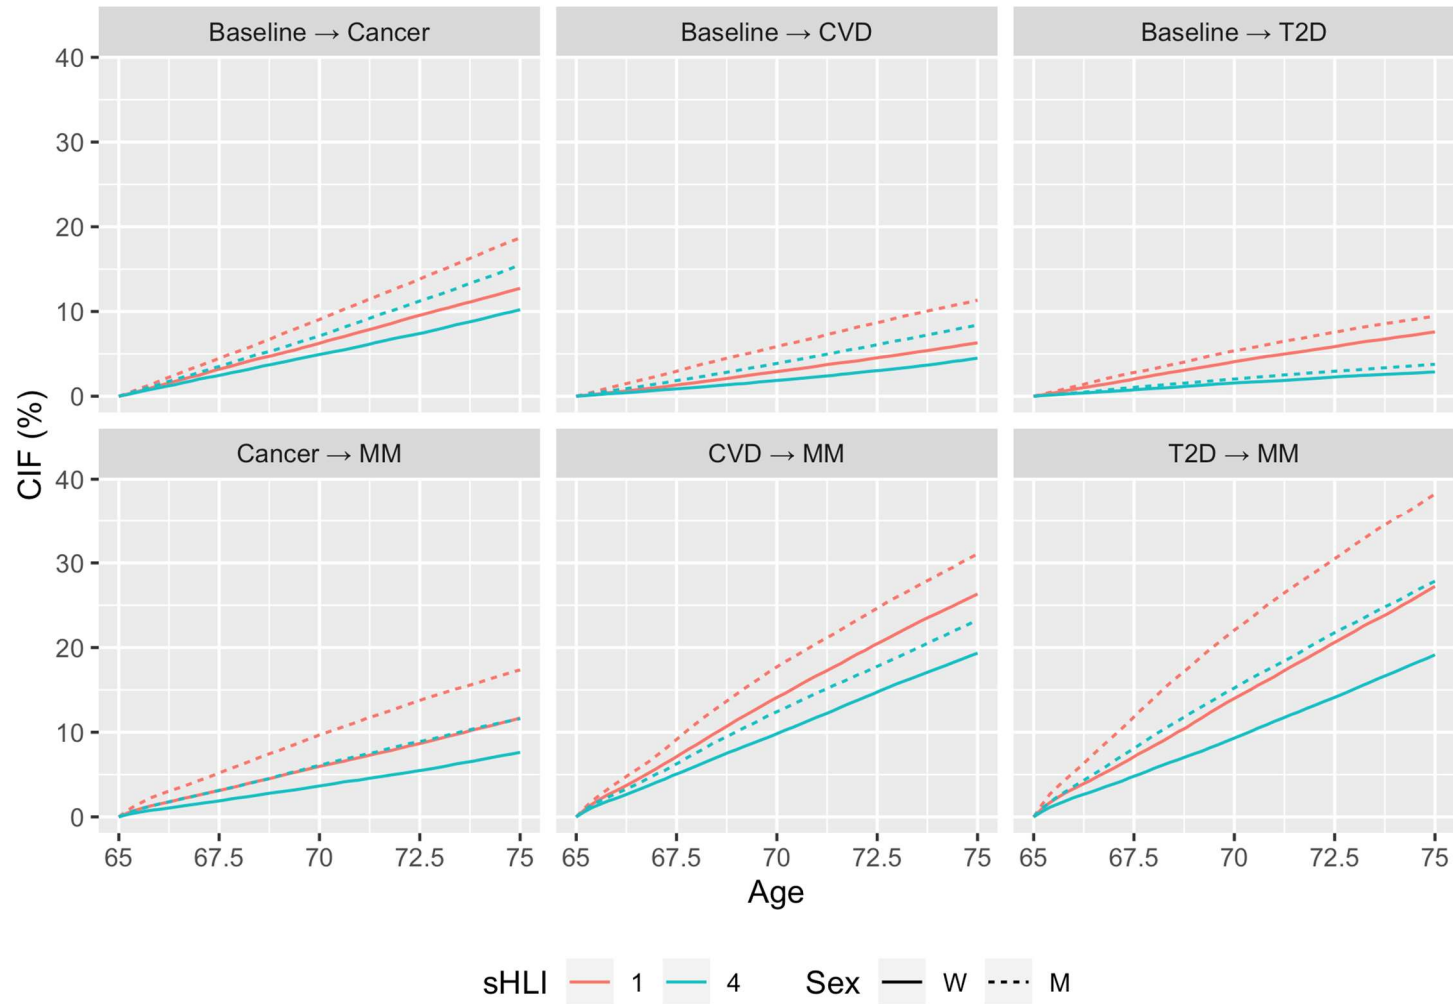

**Figure S8.** Cumulative incidence functions to develop cancer-cardiometabolic multimorbidity (MM) for 65 years old men (dotted) and women (continuous) after a less and more survivable cancer\*, and after cardiovascular disease (CVD), and type-2 diabetes (T2D) for values of the healthy lifestyle index (HLI) of 15 (healthy, 85<sup>th</sup> percentile in green) and 5 (unhealthy, 4<sup>th</sup> percentile in red); the HLI ranges from 0 to 20 units, with greater scores reflecting healthy lifestyles.

\*Cancer refers to first malignant tumors at any site excl. non-melanoma skin cancer, which were grouped according to 5-year relative survival rates into two distinct groups: (1) “less survivable cancer” with 5-year relative survival rates of less than 40% included pancreas, gallbladder, liver, lung, oesophagus, glioma, and stomach; (2) “more survivable cancer” with 5-year relative survival rates of equal or higher than 40% included ovarian, multiple myeloma, leukemia, colorectum, head and neck, non-Hodgkin’s lymphoma, kidney, meningioma, bladder, endometrium, breast, thyroid, and prostate.

Deaths were censored and not modelled as a separate outcome.

The model was stratified for centre, sex, and adjusted for education level (no schooling, primary, secondary and university or more), height (continuous), binary indicator of alcohol use (no/yes), total energy intake (kcal/day), and use of hormones and menopausal status in women

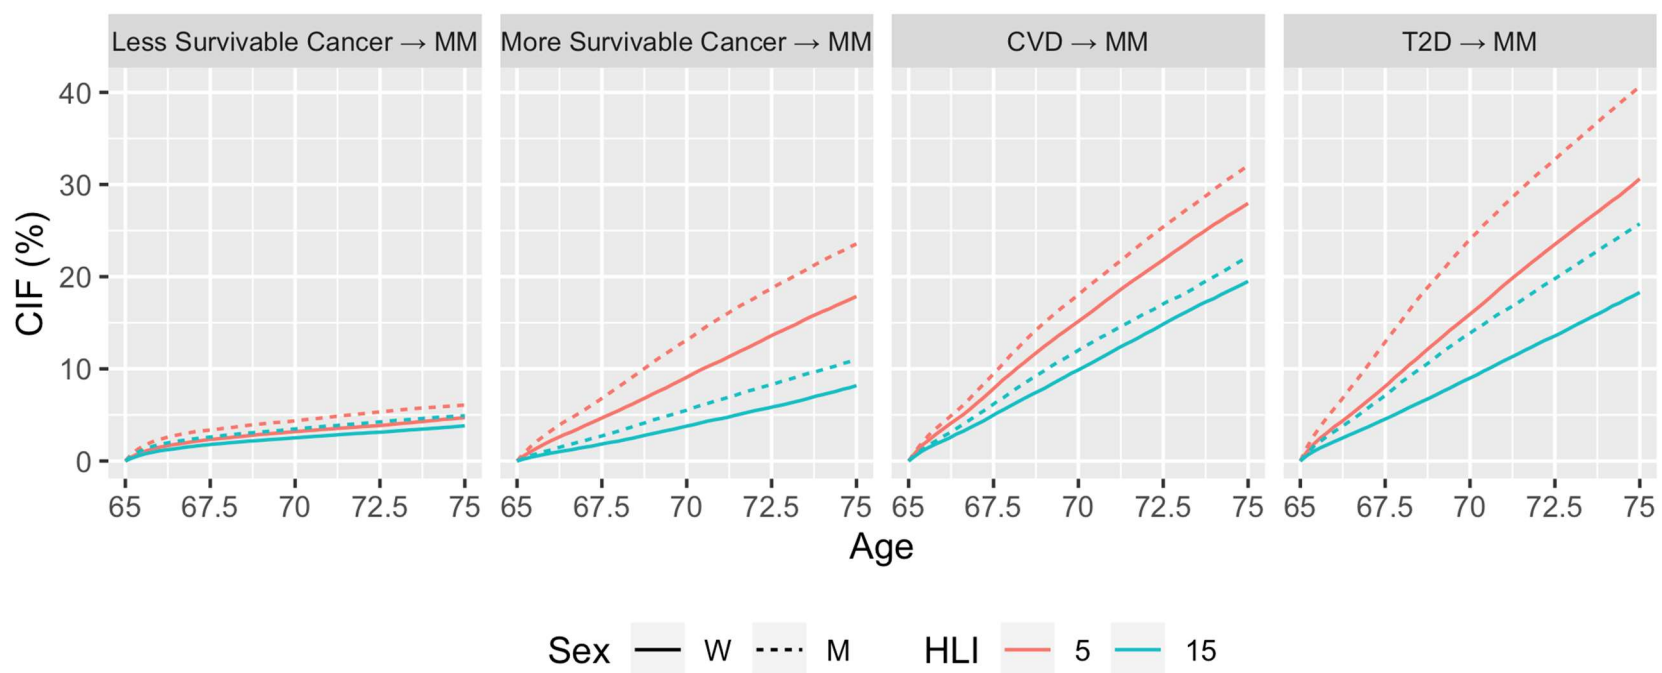

Supplement: MOESM1 [file 23393436]
